# Supplementary material for: Gender Differences in Pragmatic Communication in School-Aged Children with Autism Spectrum Disorder (ASD)
Source: Springer Nature journal article supplement (doi:10.1007/s10803-018-03873-2), 2019-01-09
Supplement: MOESM1 [file 16389158]

Supplementary Materials: Story content for Expression, Reception and Recall Narrative Instrument Fish Story

S = setting

CR = conflict resolution

Con = conclusion

1. Boy feeds fish **(S)**
   1. Must introduce the boy and the fish (1)
   2. Must mention something about food/feeding fish (1)
2. Mother gives boy money **(S)**
   1. Must introduce the mother (1)
   2. Must mention the boy receiving money from the mother (1)
3. To buy another fish **(S)**
   1. Must mention new/more/another (1) fish (1)
4. Boy leaves and walks down the street/heads to the shops **(S)**
   1. Must mention that the boy has left (1)
   2. Must mention the boy is heading somewhere (1)
5. He arrives at the pet shop **(S)**
   1. Must mention boy arriving (1)
   2. Must mention the pet shop (1)
6. Show the shopkeeper the fish he wants **(S)**
   1. Must mention the shop attendant (1)
   2. Must mention pointing to or showing the fish (1)
7. Shopkeeper puts the fish in his (the boy’s) bag **(S)**
   1. Must mention the shop attendant (1)
   2. Must mention placing the fish in the boy/his bag (1)
8. Boy buys the fish **(S)**
   1. Must mention an exchange of money (ie buys) (1)
   2. Must mention the fish (1)
9. Boy leaves pet shop/sets off home **(S)**
   1. Must mention the boy leaving (1)
   2. Must mention the boy heading home (1)
10. He meets two friends **(S)**
    1. Must mention 2 people (1)
    2. Must mention they are friends (1)
11. Boy and girl go buy an ice cream **(S)**
    1. Must mention boy and girl (1)
    2. Must mention they are going to get food (1)
12. The little girl takes the fish out of the bag **(S)**
    1. Must mention the other girl (1)
    2. Must mention the fish (1)
13. They sit on the bench **(S)**
    1. Must mention the bench (1)
    2. Must mention more than one person (they, the friends, they boy and girl) (1)
14. And eat their ice cream **(S)**
    1. Must mention them eating (1)
    2. Must mention ice cream (1)
15. The boy waves goodbye and goes home **(S)**
    1. Must mention the boy saying goodbye somehow (waves, says bye) (1)
    2. Must mention boy going home (1)
16. The boy finds he has a doll in his bag **(S)**
    1. Must mention the doll (1)
    2. Must mention him finding it or having some sort of element of surprise (1)
17. He tells his mother **(CR)**
    1. Must mention mother (1)
    2. Must mention telling (1)
18. Mother phones his friends **(CR)**
    1. Must mention mother phoning (1)
    2. Must mention friends (1)
19. Friends come over with the fish **(CR)**
    1. Must mention the friends arriving or coming over (1)
    2. Must mention fish (1)
20. They exchange the contents of the bag **(CR)**
    1. Must mention an exchange (1)
    2. Must mention the contents (ie doll and fish) (1)
21. The boy gets his fish back **(Con)**
    1. Must mention the boy (1)
    2. Must mention a return of the fish (1)
22. The boy puts the new fish in the tank **(Con)**
    1. Must mention the fact that it is another or new or multiple (ie second or new or other) fish(1)
    2. Must mention the tank (1)
23. The boy shows his friends the fish **(Con)**
    1. Must mention the boy showing (1)
    2. Must mention the friends (1)
24. The little girl is happy to have her doll **(Con)**
    1. Must mention the girl feeling an emotion such as happy, relief, glad (1)
    2. Must mention doll (1)
