# Supplementary material for: Gender Differences in Pragmatic Communication in School-Aged Children with Autism Spectrum Disorder (ASD)
Source: Springer Nature journal article supplement (doi:10.1007/s10803-018-03873-2), 2019-01-09
Supplement: MOESM2 [file 16389158]

Supplementary Materials: Examples of scored utterances and comprehension questions for the Expression Reception and Recall of Narrative Instrument (Bishop, 2004)

| Utterance | 2-point response | 1-point response | 0-point response |
| --- | --- | --- | --- |
| The boy feeds his pet fish | The boy feeds the fish | The boy has a fish | There is a boy |
| The little girl takes the fish out of the bag | The little girl switches the doll and the fish | The girl swaps the things | The girl is playing a trick |
| The boy puts his new fish in the tank | The boy puts his fish in the tank | There are two fish in the tank now | The fish has a friend |
| Comprehension question: Where do they eat their ice creams? | On a bench near the ice cream stand | On a bench | Outside |
| Comprehension question: How does the boy feel when he finds the doll? | Surprised | Sad | Ok |
