# Supplementary material for: Gender Differences in Pragmatic Communication in School-Aged Children with Autism Spectrum Disorder (ASD)
Source: Springer Nature journal article supplement (doi:10.1007/s10803-018-03873-2), 2019-01-09
Supplement: MOESM3 [file 16389158]

Supplementary Materials: Coding Manual (modelled on Norbury, Gemmell & Paul, 2014)

Step 1: Enter transcription of narrative into a Systematic Analysis of Language Transcripts (SALT) file following these general procedures:

1. Type child’s story into SALT. Begin each line with a “c” to identify the child as the speaker. If the adult also talks, use an “e” to note the speaker’s turn. End each line with punctuation.
2. Each line should represent a t-unit, which includes a full main clause and all subordinate clauses that belong to it. Each clause should have a subject and be able to stand on its own.
3. Abandoned utterances should end with a”>”.
4. False starts are hesitations or reformulations, called mazes in the SALT program, and should be surrounded by ( ).
5. Unintelligible utterances: If you really can’t hear what a child has to say, mark XXX in the transcript.
6. Missing obligatory elements are indicated by an asterisk – for example he *is going to the pet store.

GENERAL GUIDELINES FOR CODING:

1. All codes must be enclosed in square brackets [ ].

2. Utterance level (U) codes must include a space between the utterance and the code.

3. Word level (W) codes are placed next to the coded word, with NO SPACE between the word and the bracket.

A. Pragmatic Index

*Pedantic language* [PL]:

‘Formal language’ that does not enhance the meaning of the utterance. These can include stereotyped phrases that the child uses repetitively, e.g., ‘actually’ ‘in order to’. NB: Distinguish these from perseverations, which are direct repetitions within a sequence of utterances of an idea—not necessarily verbatim.

*Misattributions* [MA]:

Misattribution errors occur when an incorrect inference is drawn leading to a misunderstanding of the point of the utterance, action or story. This can include mental state misattributions (ie, stating that the boy was upset when the girls returned the fish), and special interest topics being included in the narrative (ie, talking about Minecraft during the narrative task).

*Irrelevant Detail* [ID]:

Irrelevant details include correct but nonessential mentions (e.g., mentioning the motorcycle that appears in a story picture), tangential remarks, including remarks unrelated to story, and literal description of pictures not essential to plot.

*Non-Narrator Speech* [NN]:

Narrator comes out of narrator role to comment on aspect of story (ie; asking examiner if they have a fish). Code only complete utterances, not single words (such as “sorry”) or phrases embedded in utterances.

*Inconstant reference* [IR]:

Inconstant references include unclear references to characters, or changing of character names in narrative. For example if the child starts off giving the character a proper name, then reverts to ‘the boy’, code [IR]. Code only the first instance of reversion after using proper name. Reference to an incorrect character is an error. However, if child refers to the wrong character, then corrects, do not code initial mistake as an error. If an unclear reference is made, code [ir] until obvious to listener to whom the child is referring.

*Perseveration* [P]:

Perseverative use of words or phrases – may be repetitive use of the same words or the restatement of the same idea. Code each repetitious line of part of the story after the second repetition then continue to code all subsequent repetitions.

*Vague* [V]:

Need a shared knowledge of the story to understand content independent of pronouns/character reference. Give a vague code when there is a lack of clarity in the narrative. For example if the child indicates that the boy in the story was buying a fish and then indicates that the boy was eating ice cream code this as “vague” as the child did not explain that the boy left the pet shop and met friends on his was home and decided to get ice cream.

Total Pragmatic score = ([PL] + [MA] + [ID] + [IR] + [P] + [V] + [NN]) / total number of utterances.

B. Semantic Index

*Emotion word* [EMO]:
Any word that conveys a feeling (e.g. depressed), or behavior that implies an affective element (e.g. rejoiced, scolded). Code attributions of emotions to others e.g. “You’re a pain”[EMO].

*Mental state word* [MS]:

These words typically involve thinking something and include mental state terms that express knowledge, desire, beliefs, thoughts, imagination, or plans. Code words that apply to the story teller or the characters in the story. For example, “I think [MS] the girl is suspicious [MS]”.

*Intentional utterance* [INT]:

These are utterances that imply planning or forethought by one of the characters (e.g. to go get, plan, let). Also imply awareness by one character of another’s mental state and a means to have an impact on another character’s mental state or behavior (e.g. hiding, teasing, making fun of, tricking, paying attention).

Note: “to chase” denotes intention; “to catch” does not.

*Adverb* [ADV]:

Only code adverbs ending in –ly. Do not count words that should be –ly adverbs but to which child does not add –ly.

*Character speech* [CS]:

Anything that a character actually said that could be put in quotation marks.

*Semantic Error* [SERR]:

The use of a semantically related, but incorrect, word. Example: “suitcase” for “bag”. Code only the first example of the error.

Semantic Enhancement Index = ([EMO] + [MS] + [INT] + [ADV] + [CS] - [SERR]) / total number of utterances

C. Syntactic Complexity

*Complex Sentence* [C]:

Placed at beginning of the utterance with a space intervening and includes sentences with subordinate clauses, including:

- Infinitive clauses: headed by “to” and a verb.
- Relative clauses: function as adjectives; specify nouns; may or may not be marked with “which” or “that”.
- Adverbial clauses: joined with conjunctions such as “if”, “because”, “when”.
- Gerund clauses: containing an –ing form of a verb, functioning as noun. Example: “Swimming is fun”.
- wh- clauses: marked by wh- words such as “what”, “who”, “where”, “when”, “why” and “how”.
- Propositional clauses: Marked by “cognitive” verbs, such as “think”, “guess”, “wish”, “know”, “hope”, “wonder”; may or may not contain the conjunction “that”.
- Coordinate clauses conjoined by anything except “and”, “or” and “then”.

The following should NOT be counted as complex sentences, if no other clause appears within them:

- Participial phrases with –ed, en.
- Sentences with catenatives (gonna, wanna, gotta, hafta, sposedto, let’s, or lemme) if no other subordination is present.
- Sentences in which the only form of subordination is character speech, with no other complex clause included.

*Noun Phrase Elaboration* [NP]:

More than two modifiers preceding the noun. Place without a space following the noun that is elaborated. For example The boy asked for the big shiny fish[NP].

Do not code prepositional phrases.

Syntactic Complexity = ([C] + [NP]) / total number of utterances.

D. Formulation Index

*Error Word* [EW]:

Words omitted in obligatory context (e.g., He *is[EW] going.), missing subjects (E.g., *He[EW] finds the fish.), or words used inappropriately (e.g., use of “there’s” for “there are”). Code article omissions except where the word without an article could be used as a proper name.

*Error Utterance* [EU]:

Error utterances are utterances with any type of grammatical error that cannot be attributed to a single word. This includes incomplete or nonsensical utterances in which the meaning is unclear because of multiple misuses and referential errors (e.g., “he would want him so in order to get his friends back and in order for the happen everything would be ok then”).

*Abandoned Utterance* [>]:

SALT program will count any utterance ending with > as abandoned.

*Unintelligible Utterance* [XXX]:

SALT program will count completely and partially unintelligible utterances separately.

*Maze* [()]:

Refers to utterances with any mazes, regardless of number.

Formulation Index = ([EW] + [EU] + [>] + [XXX] + [()]) / total number of utterances

E. Story Macrostructure: Settings, Conflict/Conflict Resolution, Conclusion, Cohesion and Referencing

E.1 Settings, Conflict/Conflict Resolution, Conclusion

Assign a score of 0, 1 or 2 to each utterance according to the story context. A score of 2 should be awarded when all of the salient elements of story point are present. A score of 1 should be awarded if only one of the elements is missing, and a 0 should be awarded if none of the salient elements are included in the utterance. Add the number of points for each category (Settings, Conflict/Conflict Resolution, Conclusion) and divided by the total number of points available for that section (total points for Settings, Conflict/Conflict Resolution and Conclusion is 32, 8, and 8 respectively) to produce a percentage. Use this percentage to assign a rating of immature (<33%), emerging (33-75%), or proficient (>75%) in each of the areas.

E.2 Cohesion and Referencing

Cohesion and Referencing are derived from examining the overall narrative. Cohesion refers to how well the story flowed, whether the major events were emphasized, and if the story made sense. Referencing is a rating of how well the child refers to the correct characters or events to help reduce confusion. Each narrative could receive a rating of either “immature”, “emerging” or “proficient”. Assign a rating of “immature” if there are more than 3 mistakes or unclear points in the narrative. Assign a rating of “Emerging” if there are 2 or 3 mistakes or unclear points in the narrative. Assign a rating of “Proficient” if there are 0 or 1 mistakes or unclear points in the narrative.
